# Supplementary material for: Trends of drug shortages in China from 2018 to 2020: A retrospective observational study
Source: PubMed Central journal article supplement (PMC11466498; doi:10.7189/jogh.14.04225), 2024-10-11
Supplement: jogh-14-04225-s001.pdf [file jogh-14-04225-s001.pdf]

## Online Supplementary Document

**Title:** Trends of drug shortages from 2018 to 2020 in China: A retrospective observational study

**Authors:** Tao Huang, Lin Bai, Huangqianyu Li, Luwen Shi, Xiaodong Guan

### Contents

|                                                                                                                                     |   |
|-------------------------------------------------------------------------------------------------------------------------------------|---|
| Figure S1. Data collection and processing and calculation of the three outcome measures.....                                        | 2 |
| Table S1. Top ten drug products that reported most frequently from 2018 to 2020. ....                                               | 3 |
| Table S2. Trends on number, geographical coverage and duration of reported shortages by different subgroups from 2018 to 2020. .... | 4 |

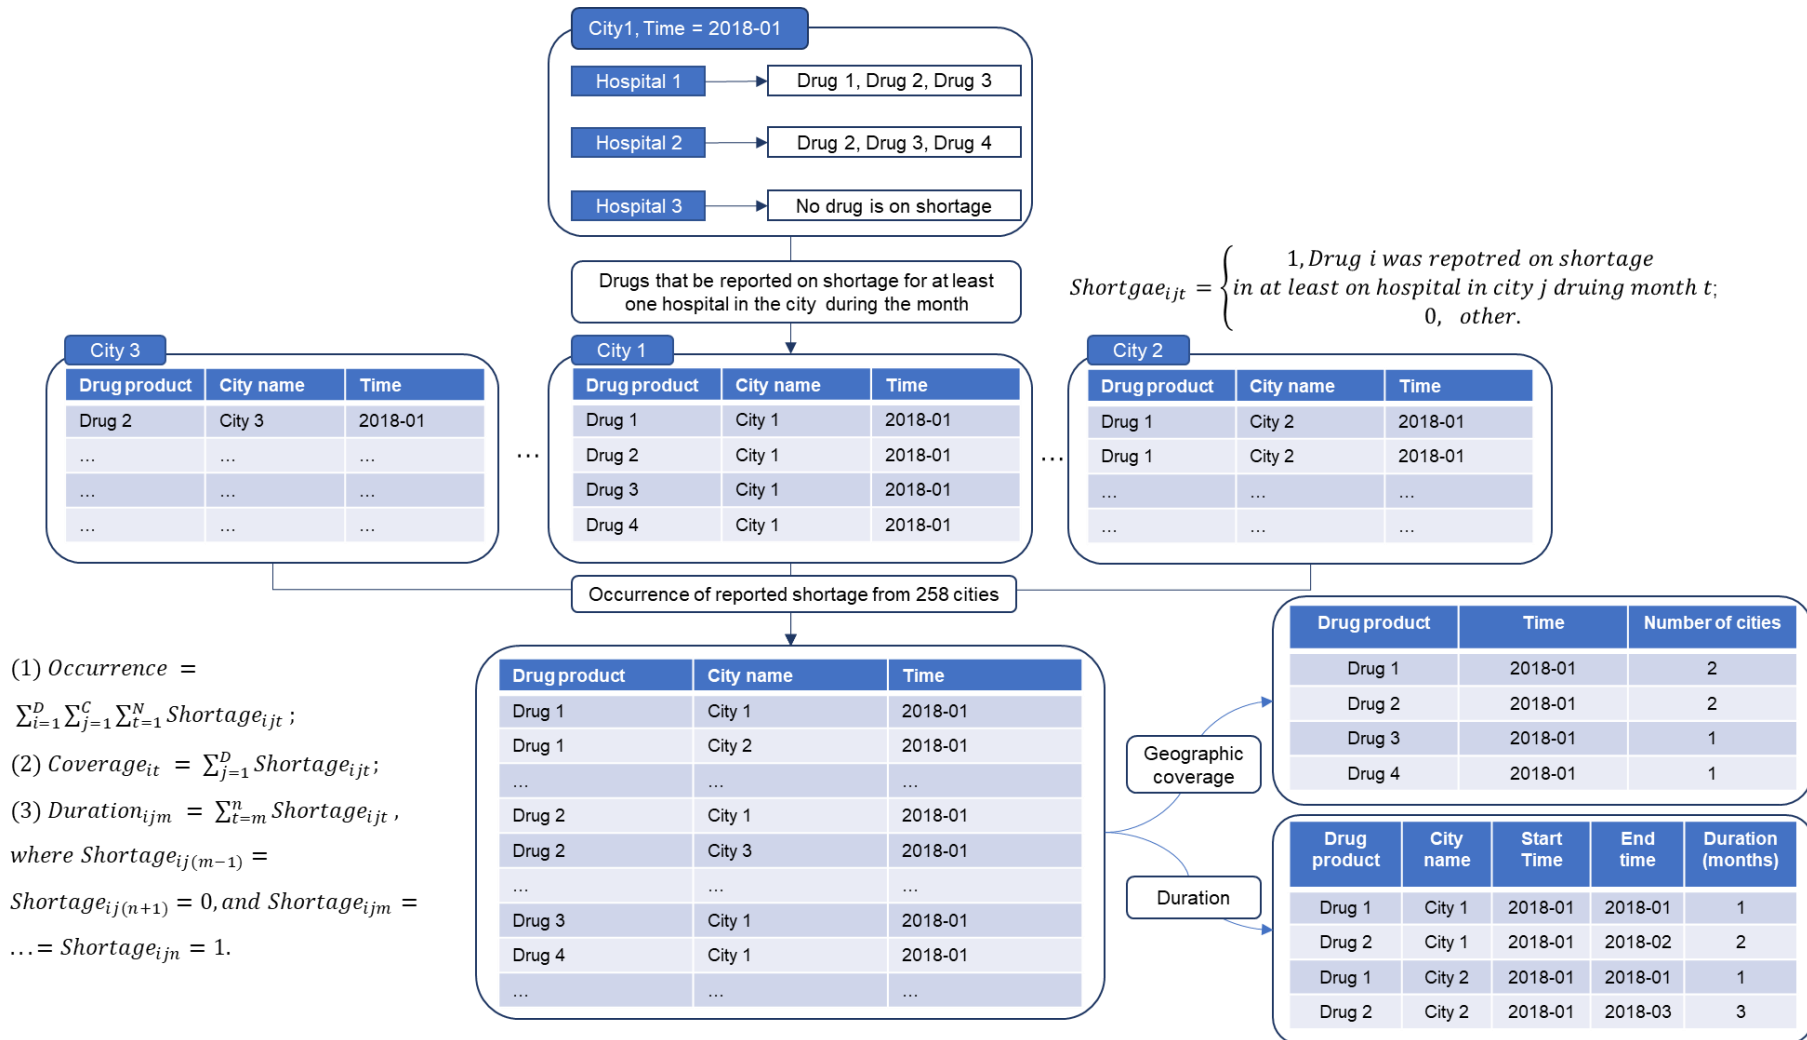

**Figure S1.** Data collection and processing and calculation of the three outcome measures.

**Table S1.** Top ten drug products that reported most frequently from 2018 to 2020

| Generic name           | Dosage form | Route of administration | Total occurrence of reported shortage |
|------------------------|-------------|-------------------------|---------------------------------------|
| Methotrexate           | Powder      | Parenteral              | 1346                                  |
| Allopurinol            | Tablet      | Oral                    | 1280                                  |
| Ketamine               | Solutions   | Parenteral              | 981                                   |
| Cytarabine             | Powder      | Parenteral              | 951                                   |
| Nitroglycerin          | Tablet      | Sublingual              | 892                                   |
| Vincristine            | Powder      | Parenteral              | 698                                   |
| Atropine               | Solution    | Parenteral              | 664                                   |
| Vitamin K1             | Solutions   | Parenteral              | 633                                   |
| Posterior Pituitary    | Solution    | Parenteral              | 612                                   |
| Pyridostigmine Bromide | Tablet      | Oral                    | 599                                   |

**Table S2.** Trends on number, geographical coverage and duration of reported shortages by different subgroups from 2018 to 2020

| Characteristics                | Monthly number of shortages |         |        |         |         | Geographical coverage |         |        |         |         | Duration* |         |        |        |         |
|--------------------------------|-----------------------------|---------|--------|---------|---------|-----------------------|---------|--------|---------|---------|-----------|---------|--------|--------|---------|
|                                | Z                           | P value | 2018M1 | 2020M12 | Change% | Z                     | P value | 2018M1 | 2020M12 | Change% | Z         | P value | 2018M7 | 2020M6 | Change% |
| <b>All</b>                     | -3.83                       | <0.001  | 2655   | 2109    | -20.6%  | -2.02                 | 0.043   | 2.5    | 2.5     | 0.3%    | -3.10     | 0.002   | 2.9    | 2.6    | -11.5%  |
| <b>Emergency medicine</b>      | 0.90                        | 0.367   | 238    | 281     | 18.1%   | 1.70                  | 0.090   | 4.0    | 5.4     | 36.2%   | -1.64     | 0.102   | 3.0    | 3.2    | 8.3%    |
| <b>Dosage form</b>             |                             |         |        |         |         |                       |         |        |         |         |           |         |        |        |         |
| Aerosol                        | 1.64                        | 0.100   | 13     | 11      | -15.4%  | -0.15                 | 0.881   | 1.4    | 1.2     | -15.4%  | 0.43      | 0.670   | 1.3    | 2.3    | 72.5%   |
| Capsule                        | -2.54                       | 0.011   | 146    | 124     | -15.1%  | -2.59                 | 0.010   | 1.7    | 1.9     | 9.8%    | -1.36     | 0.172   | 2.6    | 2.5    | -5.7%   |
| Drop                           | -5.26                       | <0.001  | 5      | 1       | -80.0%  | -3.74                 | <0.001  | 1.0    | 1.0     | 0.0%    | -1.65     | 0.099   | 1.0    | 1.0    | 0.0%    |
| Emulsion                       | -1.22                       | 0.223   | 28     | 35      | 25.0%   | 0.29                  | 0.772   | 1.3    | 1.6     | 19.3%   | -1.37     | 0.172   | 4.1    | 2.8    | -33.6%  |
| Gel                            | -0.62                       | 0.537   | 8      | 20      | 150.0%  | -2.69                 | 0.007   | 1.0    | 1.2     | 17.6%   | -0.67     | 0.503   | 1.3    | 2.1    | 60.7%   |
| Granule                        | -3.05                       | 0.002   | 64     | 26      | -59.4%  | -2.33                 | 0.020   | 2.1    | 1.3     | -39.1%  | -0.62     | 0.535   | 1.5    | 2.2    | 50.5%   |
| Liquid                         | 1.17                        | 0.243   | 3      | 6       | 100.0%  | 1.17                  | 0.243   | 3.0    | 6.0     | 100.0%  | -0.25     | 0.799   | 0.0    | 2.0    | NA†     |
| Miscellaneous                  | -0.92                       | 0.357   | 0      | 3       | NA†     | -0.92                 | 0.357   | 0.0    | 3.0     | NA†     | -2.50     | 0.012   | 2.0    | 0.0    | -100.0% |
| Ointment                       | -2.84                       | 0.004   | 45     | 31      | -31.1%  | -0.98                 | 0.328   | 2.0    | 1.7     | -12.0%  | -2.43     | 0.015   | 3.6    | 2.9    | -19.6%  |
| Patch                          | 0.36                        | 0.716   | 1      | 2       | 100.0%  | -1.17                 | 0.241   | 1.0    | 1.0     | 0.0%    | 0.00      | 1.000   | 1.0    | 0.0    | -100.0% |
| Pill                           | -3.39                       | 0.001   | 3      | 2       | -33.3%  | -4.71                 | <0.001  | 1.5    | 1.0     | -33.3%  | -1.24     | 0.217   | 1.0    | 0.0    | -100.0% |
| Powder                         | 0.81                        | 0.416   | 444    | 437     | -1.6%   | 1.30                  | 0.192   | 2.3    | 2.8     | 22.7%   | -2.06     | 0.040   | 2.3    | 2.8    | 18.7%   |
| Solution                       | -4.23                       | <0.001  | 1022   | 677     | -33.8%  | -5.79                 | <0.001  | 3.1    | 2.7     | -11.0%  | -1.46     | 0.143   | 2.8    | 2.7    | -3.3%   |
| Suppository                    | -1.36                       | 0.173   | 14     | 9       | -35.7%  | 0.34                  | 0.733   | 1.0    | 1.5     | 50.0%   | -0.42     | 0.673   | 1.8    | 3.8    | 117.1%  |
| Suspension                     | -3.83                       | <0.001  | 21     | 9       | -57.1%  | -4.57                 | <0.001  | 2.3    | 1.5     | -35.7%  | -1.32     | 0.186   | 3.6    | 0.0    | -100.0% |
| Syrup                          | 0.26                        | 0.796   | 3      | 3       | 0.0%    | 1.14                  | 0.255   | 1.5    | 1.5     | 0.0%    | -0.69     | 0.490   | 1.0    | 0.0    | -100.0% |
| Tablet                         | -2.03                       | 0.042   | 834    | 710     | -14.9%  | -2.24                 | 0.025   | 2.5    | 2.6     | 5.1%    | -3.40     | 0.001   | 3.3    | 2.3    | -30.7%  |
| Tincture                       | 1.35                        | 0.178   | 1      | 3       | 200.0%  | 0.97                  | 0.331   | 1.0    | 1.5     | 50.0%   | -1.95     | 0.052   | 1.0    | 0.0    | -100.0% |
| <b>Route of administration</b> |                             |         |        |         |         |                       |         |        |         |         |           |         |        |        |         |
| Buccal                         | 0.51                        | 0.609   | 1      | 3       | 200.0%  | 0.19                  | 0.852   | 1.0    | 1.0     | 0.0%    | -0.18     | 0.856   | 1.0    | 4.0    | 300.0%  |
| Cutaneous                      | -1.48                       | 0.139   | 76     | 94      | 23.7%   | -2.22                 | 0.026   | 1.7    | 1.6     | -1.9%   | -1.61     | 0.107   | 4.2    | 3.1    | -25.9%  |
| Hemodialysis                   | 1.03                        | 0.301   | 2      | 0       | -100.0% | 1.03                  | 0.301   | 2.0    | 0.0     | -100.0% | 1.09      | 0.277   | 0.0    | 2.0    | NA†     |

| Characteristics                                     | Monthly number of shortages |         |        |         |         | Geographical coverage |         |        |         |         | Duration* |         |        |        |         |
|-----------------------------------------------------|-----------------------------|---------|--------|---------|---------|-----------------------|---------|--------|---------|---------|-----------|---------|--------|--------|---------|
|                                                     | Z                           | P value | 2018M1 | 2020M12 | Change% | Z                     | P value | 2018M1 | 2020M12 | Change% | Z         | P value | 2018M7 | 2020M6 | Change% |
| Inhalation                                          | -2.42                       | 0.015   | 18     | 11      | -38.9%  | -2.12                 | 0.034   | 1.5    | 1.2     | -18.5%  | 0.10      | 0.921   | 1.5    | 1.7    | 11.1%   |
| Nasal                                               | 1.04                        | 0.300   | 5      | 8       | 60.0%   | 0.89                  | 0.372   | 1.3    | 1.6     | 28.0%   | 0.96      | 0.336   | 1.3    | 2.4    | 82.1%   |
| Ophthalmic                                          | -3.64                       | <0.001  | 85     | 65      | -23.5%  | -8.04                 | <0.001  | 2.0    | 1.9     | -6.1%   | -2.11     | 0.035   | 2.4    | 1.9    | -19.7%  |
| Oral                                                | -2.76                       | 0.006   | 1092   | 885     | -19.0%  | -2.47                 | 0.014   | 2.2    | 2.3     | 2.8%    | -3.00     | 0.003   | 3.1    | 2.3    | -24.3%  |
| Otic                                                | -0.77                       | 0.444   | 4      | 2       | -50.0%  | -1.85                 | 0.065   | 2.0    | 1.0     | -50.0%  | -2.28     | 0.023   | 1.0    | 0.0    | -100.0% |
| Parenteral                                          | -5.05                       | <0.001  | 1341   | 1007    | -24.9%  | -1.60                 | 0.110   | 2.9    | 2.9     | -0.2%   | -2.11     | 0.035   | 2.7    | 2.7    | 1.7%    |
| Rectal                                              | -0.15                       | 0.878   | 7      | 7       | 0.0%    | -1.25                 | 0.212   | 1.4    | 1.4     | 0.0%    | -0.40     | 0.691   | 2.5    | 4.8    | 92.0%   |
| Sublingual                                          | -0.37                       | 0.709   | 4      | 7       | 75.0%   | -0.67                 | 0.503   | 4.0    | 7.0     | 75.0%   | -2.63     | 0.008   | 4.8    | 0.0    | -100.0% |
| Vaginal                                             | -1.54                       | 0.123   | 20     | 20      | 0.0%    | 0.81                  | 0.419   | 1.1    | 2.9     | 157.1%  | -2.13     | 0.033   | 2.2    | 2.1    | -4.0%   |
| <b>Therapeutic area</b>                             |                             |         |        |         |         |                       |         |        |         |         |           |         |        |        |         |
| Alimentary tract and metabolism                     | -2.76                       | 0.006   | 375    | 289     | -22.9%  | -2.59                 | 0.010   | 2.1    | 2.2     | 2.8%    | -1.46     | 0.143   | 2.5    | 2.6    | 4.9%    |
| Antiinfectives for systemic use                     | -3.22                       | 0.001   | 346    | 243     | -29.8%  | -5.75                 | <0.001  | 2.5    | 2.1     | -15.6%  | -0.51     | 0.613   | 2.5    | 2.6    | 4.6%    |
| Antineoplastic and immunomodulating agents          | -0.13                       | 0.900   | 256    | 236     | -7.8%   | -0.01                 | 0.995   | 2.9    | 3.2     | 9.6%    | -2.67     | 0.007   | 2.7    | 2.4    | -11.9%  |
| Antiparasitic products, insecticides and repellents | -2.48                       | 0.013   | 15     | 9       | -40.0%  | -2.36                 | 0.018   | 2.5    | 1.8     | -28.0%  | -0.27     | 0.784   | 2.4    | 4.0    | 65.5%   |
| Blood and blood forming organs                      | -1.18                       | 0.236   | 252    | 225     | -10.7%  | -0.10                 | 0.054   | 2.9    | 3.3     | 13.9%   | 0.07      | 0.941   | 2.2    | 3.1    | 43.6%   |
| Cardiovascular system                               | -0.74                       | 0.458   | 311    | 268     | -13.8%  | -0.49                 | 0.622   | 2.6    | 2.9     | 9.1%    | -2.16     | 0.031   | 2.8    | 2.7    | -3.9%   |
| Dermatologicals                                     | -1.28                       | 0.201   | 88     | 89      | 1.1%    | -3.72                 | <0.001  | 2.1    | 1.8     | -15.4%  | -1.79     | 0.074   | 4.3    | 3.1    | -28.4%  |
| Genito urinary                                      | -2.23                       | 0.026   | 110    | 74      | -32.7%  | -1.16                 | 0.247   | 2.1    | 2.6     | 22.9%   | -2.60     | 0.009   | 3.3    | 2.0    | -40.8%  |

| Characteristics                                                 | Monthly number of shortages |         |        |         |         | Geographical coverage |         |        |         |         | Duration* |         |        |        |         |
|-----------------------------------------------------------------|-----------------------------|---------|--------|---------|---------|-----------------------|---------|--------|---------|---------|-----------|---------|--------|--------|---------|
|                                                                 | Z                           | P value | 2018M1 | 2020M12 | Change% | Z                     | P value | 2018M1 | 2020M12 | Change% | Z         | P value | 2018M7 | 2020M6 | Change% |
| system and sex hormones                                         |                             |         |        |         |         |                       |         |        |         |         |           |         |        |        |         |
| Musculo-skeletal system                                         | -1.53                       | 0.126   | 84     | 67      | -20.2%  | -1.02                 | 0.306   | 1.9    | 2.2     | 13.2%   | -3.47     | 0.001   | 4.9    | 2.0    | -58.5%  |
| Nervous system                                                  | -3.40                       | 0.001   | 362    | 257     | -29.0%  | -4.33                 | <0.001  | 2.8    | 2.4     | -13.6%  | -2.80     | 0.005   | 3.0    | 2.3    | -22.6%  |
| Respiratory system                                              | -4.12                       | <0.001  | 181    | 121     | -33.1%  | -6.65                 | <0.001  | 2.4    | 2.0     | -14.2%  | -0.05     | 0.960   | 3.6    | 2.6    | -27.0%  |
| Sensory organs                                                  | -3.15                       | 0.002   | 97     | 75      | -22.7%  | -4.60                 | <0.001  | 1.9    | 1.8     | -5.7%   | -1.24     | 0.215   | 2.3    | 1.9    | -18.9%  |
| Systemic hormonal preparations, excl. sex hormones and insulins | -3.09                       | 0.002   | 79     | 73      | -7.6%   | -1.50                 | 0.135   | 2.7    | 3.0     | 11.7%   | -2.36     | 0.018   | 3.6    | 2.5    | -30.1%  |
| Various                                                         | -0.54                       | 0.593   | 99     | 83      | -16.2%  | 2.36                  | 0.018   | 2.5    | 3.5     | 36.2%   | 0.87      | 0.385   | 3.4    | 2.5    | -25.1%  |

\*To avoid possible bias stemming from the possibility that shortages starting earlier would expect longer duration, trend tests for duration of shortages were performed after excluding data from the first and last six months (almost one standard deviations of average shortage duration) of the study period.

†NA, not applicable when the denominator is zero.
